# Supplementary material for: Global disruption of degree rank order: a hallmark of chronic pain
Source: PubMed Central journal article supplement (PMC5057075; doi:10.1038/srep34853), 2016-10-11
Supplement: srep34853-s1.pdf [file srep34853-s1.pdf]

## Supporting information for

# Global disruption of degree rank order: a hallmark of chronic pain

**Authors:** Ali Mansour<sup>1</sup>, Alex T. Baria<sup>1</sup>, Pascal Tetreault<sup>1</sup>, Etienne Vachon-Presseau<sup>1</sup>, Pei-Ching Chang<sup>1</sup>, Lejian Huang<sup>1</sup>, A. Vania Apkarian<sup>1\*</sup> and Marwan N. Baliki<sup>2,3\*</sup>

**Affiliations:**

<sup>1</sup>Department of Physiology, Northwestern University, Feinberg School of Medicine, Chicago, Illinois 60611, USA.

<sup>2</sup>Department of Physical Medicine and Rehabilitation, Northwestern University, Chicago, Illinois 60611, USA.

<sup>3</sup>Rehabilitation Institute of Chicago, Chicago, Illinois 60611, USA.

\*Correspondence to A. Vania Apkarian, email: [a-apkarian@northwestern.edu](mailto:a-apkarian@northwestern.edu) and to Marwan N. Baliki, email: [marwanbaliki2008@u.northwestern.edu](mailto:marwanbaliki2008@u.northwestern.edu)

*Supplementary information includes:*

Supplementary Figs. 1 - 11

Supplementary Tables 1 - 13

Supplementary References

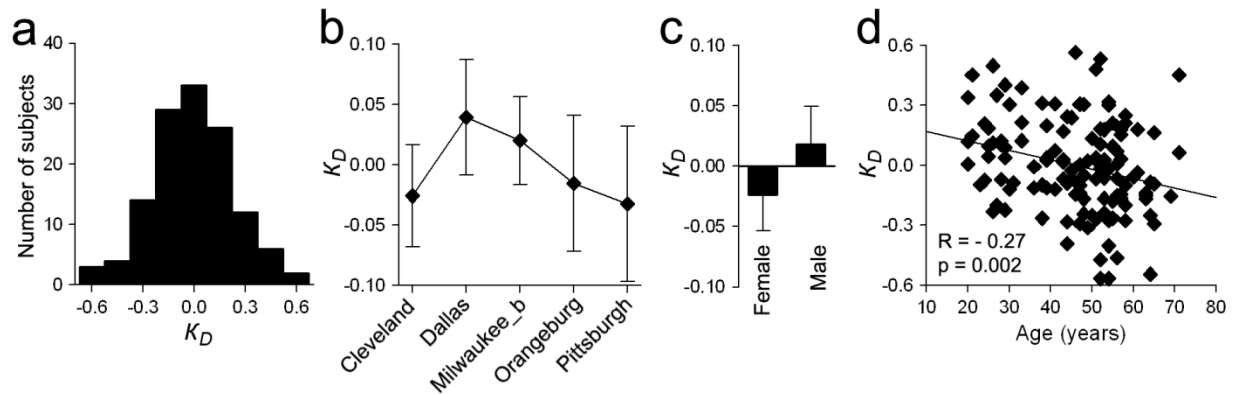

**Supplementary Fig. 1. Variability of degree rank order disruption ( $k_D$ ) in relation to site, age and gender for the off-site connectome1000 control group.** Graph shows the distribution of  $k_D$  for all off-site control subjects ( $n = 129$ ) used in the study, relative to the group mean degree map.  $k_D$  showed a normal (Gaussian) distribution around 0. Relationship of  $k_D$  with data source site, gender and age was investigated using a ANCOVA. **(b)** Plot shows the mean  $\pm$  s.e.m for  $k_D$  for each site, relative to the group mean degree map.  $k_D$  did not exhibit any significant site effect ( $F_{(4,122)} = 0.42$ ,  $p = 0.80$ ). **(c)** Bar graph represents the mean  $\pm$  s.e.m for  $k_D$  for females and males.  $k_D$  did not exhibit any significant gender effect ( $F_{(1,122)} = 1.00$ ,  $p = 0.30$ ). **(d)** Scatter plot shows the relationship between age and  $k_D$  across all subjects.  $k_D$  showed a significant relationship with age ( $R = -0.27$ ,  $p = 0.002$ ).

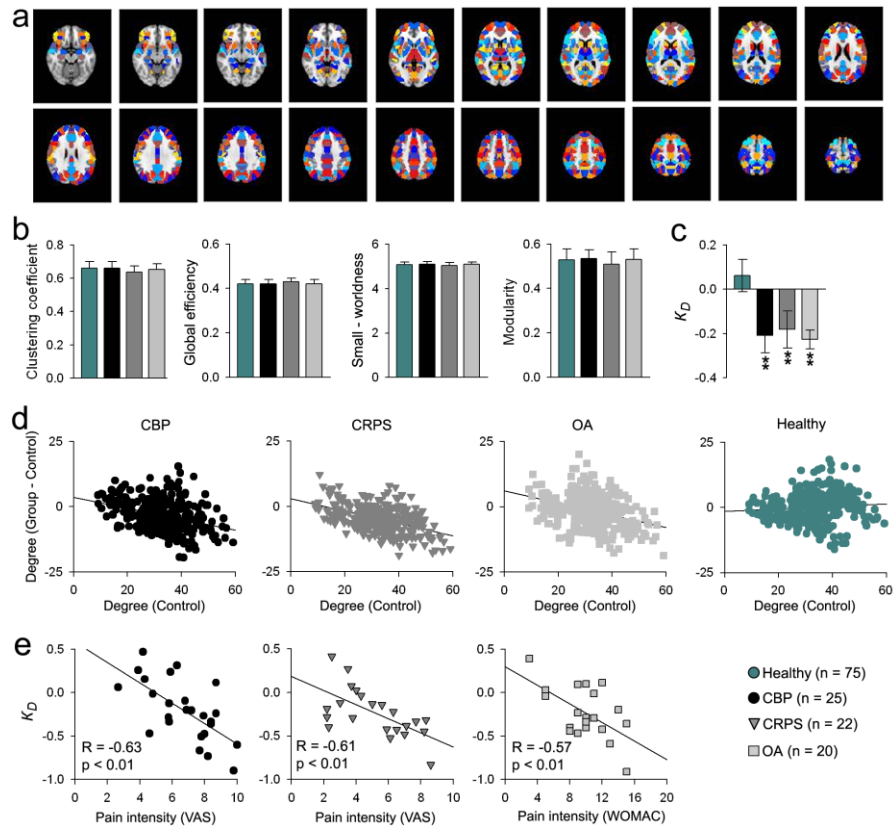

**Supplementary Fig. 2. Effect of parcellation scale on degree rank order disruption in chronic pain.**

**(a)** Brain networks were constructed from a 480 ROI template derived from a cortical and subcortical Harvard-Oxford structural atlas for 10 % link density. **(b)** Bar graphs show mean  $\pm$  s.e.m of global graph properties for all groups. Global graph properties were not different between healthy subjects and patient groups regarding: clustering coefficient ( $F_{(3,136)} = 1.74$ ,  $p = 0.16$ ), global efficiency ( $F_{(3,136)} = 1.57$ ,  $p = 0.20$ ), small-worldness ( $F_{(3,136)} = 1.56$ ,  $p = 0.20$ ), and modularity ( $F_{(3,136)} = 1.84$ ,  $p = 0.12$ ). Differences between groups were computed using ANCOVA analysis with age and gender as covariates of no interest. **(c)** Bar graph shows the mean  $\pm$  s.e.m of the degree rank order disruption ( $k_D$ ) computed relative to the off-site healthy control group. Patients exhibited significant degree rank order disruption compared to our healthy controls (group effect:  $F_{(3,136)} = 6.29$ ,  $p = 0.0005$ , ANCOVA with age and gender as covariates of no interest), with CBP ( $-0.21 \pm 0.07$ ), CRPS ( $-0.18 \pm 0.08$ ) and OA ( $-0.22 \pm 0.04$ ) showing significantly lower  $k_D$  compared to our healthy control group ( $0.06 \pm 0.04$ ; \* $p < 0.05$ ; \*\* $p < 0.01$ , Tukey post-hoc). **(d)** Scatter plots depict the group  $k_D$  for CBP, CRPS, OA and our healthy control compared to the off-site control group, for 10% link density. **(e)** Scatter plots show the relationship between  $k_D$  and pain intensity at the time of the scan for all patients groups.  $k_D$  showed a significant relationship to pain intensity in CBP ( $R = -0.63$ ,  $p < 0.001$ ), CRPS ( $R = -0.61$ ,  $p = 0.006$ ) and OA ( $R = -0.57$ ,  $p = 0.03$ ) for the 10% link density analysis. Finally, we also computed  $k_D$  using the 90 ROI AAL template for 10 % link density (data not shown). Similarly to the results listed above, patients exhibited significant degree rank order disruption compared to our healthy controls (group effect:  $F_{(3,136)} = 5.33$ ,  $p = 0.003$ , ANCOVA with age and gender as covariates of no interest), with CBP ( $-0.19 \pm 0.06$ ), CRPS ( $-0.17 \pm 0.09$ ) and OA ( $-0.20 \pm 0.06$ ) showing significantly lower  $k_D$  compared to our healthy control group ( $0.05 \pm 0.07$ ). Furthermore,  $k_D$  and pain intensity at the time of the scan for all patient groups showed a significant relationship to pain intensity in CBP ( $R = -0.59$ ,  $p < 0.01$ ), CRPS ( $R = -0.55$ ,  $p < 0.01$ ) and OA ( $R = -0.58$ ,  $p < 0.05$ ).

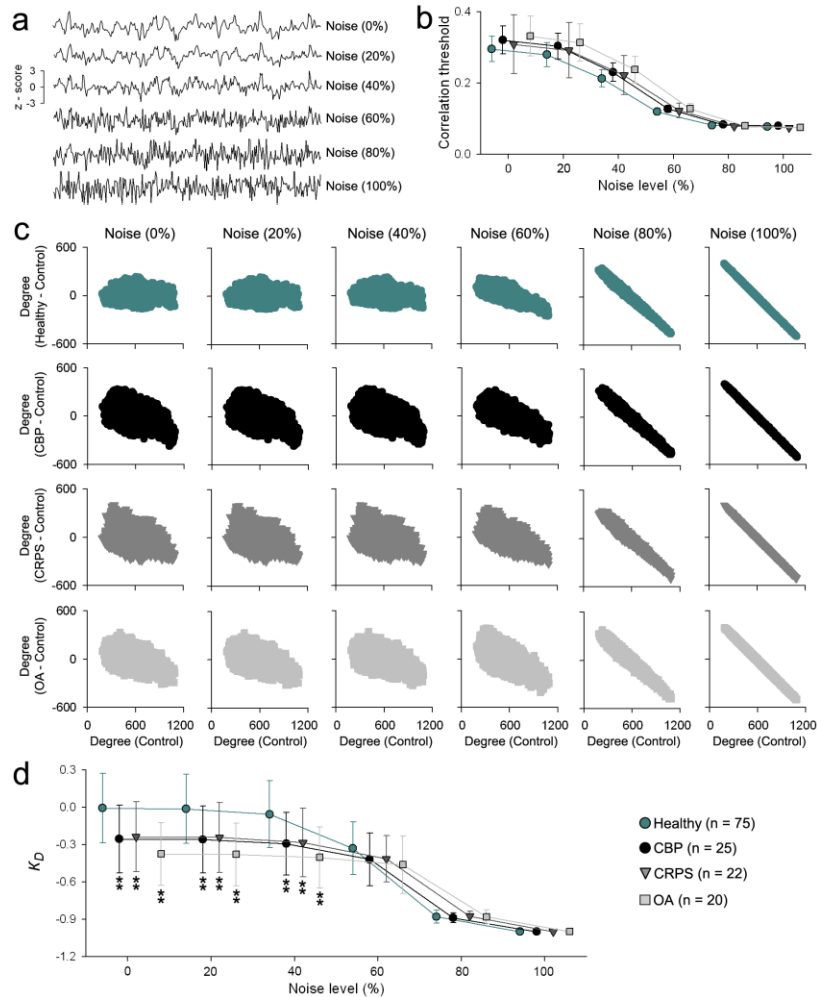

**Supplementary Fig. 3. Effect of noise on degree rank order disruption.** (a) Example from a single voxel bold signal in which white Gaussian noise (WGN) was introduced to the original bold time series at various levels ranging from 20% (80% original signal plus 20% noise) to 100% (0% original signal plus 100% noise) with 20% increments. Noise level of 0% denotes the original signal (b) Graph depicts the mean  $\pm$  s.e.m. of correlation values required to produce binary functional connectivity maps of 10% link density for CBP, CRPS, OA and our healthy controls, at the various noise levels. For all groups, there was a huge noise effect ( $F_{(5,680)} = 189.53$ ,  $p < 0.0001$ , repeated measure ANCOVA, with age and gender as covariates of no interest). For noise levels  $> 60\%$ , threshold had to be set to an  $r$ -value  $< 0.1$ . (c) Scatter plots depict the group  $k_D$  for CBP, CRPS, OA and our healthy group compared to the off-site control group for 10% link density at various noise levels. The addition of noise resulted in an artificial  $k_D$  only when the noise constituted  $\geq 60\%$  of the original bold signal. (d) Mean  $\pm$  s.e.m of individual  $k_D$  values for CBP, CRPS, OA and our healthy subjects. All groups showed stable individual  $k_D$  values up to noise level of about 60%, which subsequently decreased with increased WGN (group effect:  $F_{(3,136)} = 9.96$ ,  $p = 0.0001$ , group by noise interaction:  $F_{(15,680)} = 12.10$ ,  $p < 0.0001$ , repeated measure ANCOVA). Significant differences in  $k_D$  values between patients and healthy subjects at different noise levels were computed using Tukey post-hoc tests (\* $p < 0.05$ ; \*\* $p < 0.01$ , compared to our healthy control group). It is important to note that we performed a similar analysis for graphs constructed at 20% link density. We found that an addition of 20% noise was sufficient to distort  $k_D$  measurements (data not shown). These results indicate that the resilience of 10% networks to WGN is probably due to high correlation cut-offs and the sparsity of the network.

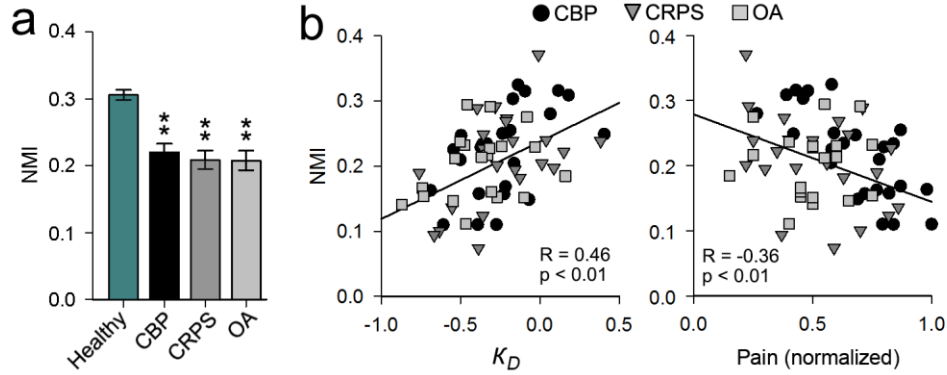

**Supplementary Fig. 4. Modular changes in patients reflects globally altered connectivity.**

We assessed the contribution of the localized nodal module-allegiance changes within the insular and lateral parietal regions (**Figure 2e**) to the overall modular changes observed in patients. **(a)** Mean  $\pm$  s.e.m normalized mutual information (NMI) for all groups measured with respect to the mean off-site healthy control after removing the 135 insular and 35 lateral parietal nodes that exhibited significant differences in module-allegiance in patients. NMI still showed a significant group effect ( $F_{(3,136)} = 25.85$ ,  $p < 0.0001$ , ANCOVA with age and gender as covariates of no interest), with CBP ( $0.22 \pm 0.01$ ), CRPS ( $0.20 \pm 0.01$ ) and OA ( $0.21 \pm 0.01$ ) exhibiting lower NMI compared to the healthy group ( $0.30 \pm 0.01$ ) (\* $p < 0.05$ ; \*\* $p < 0.01$ , Tukey post-hoc compared to healthy). **(b)** NMI of all patients with respect to the mean off-site control showed a significant correlation to  $k_D$  ( $r = 0.46$ ,  $p < 0.001$ ) and to pain intensity ( $r = -0.36$ ,  $p < 0.01$ ). These results indicate that overall changes in community structure observed in patients are mostly driven by nodal memberships throughout the network, and not by localized changes in the insula and parietal regions, which showed similar patterns of module-allegiance changes across types of chronic pain.

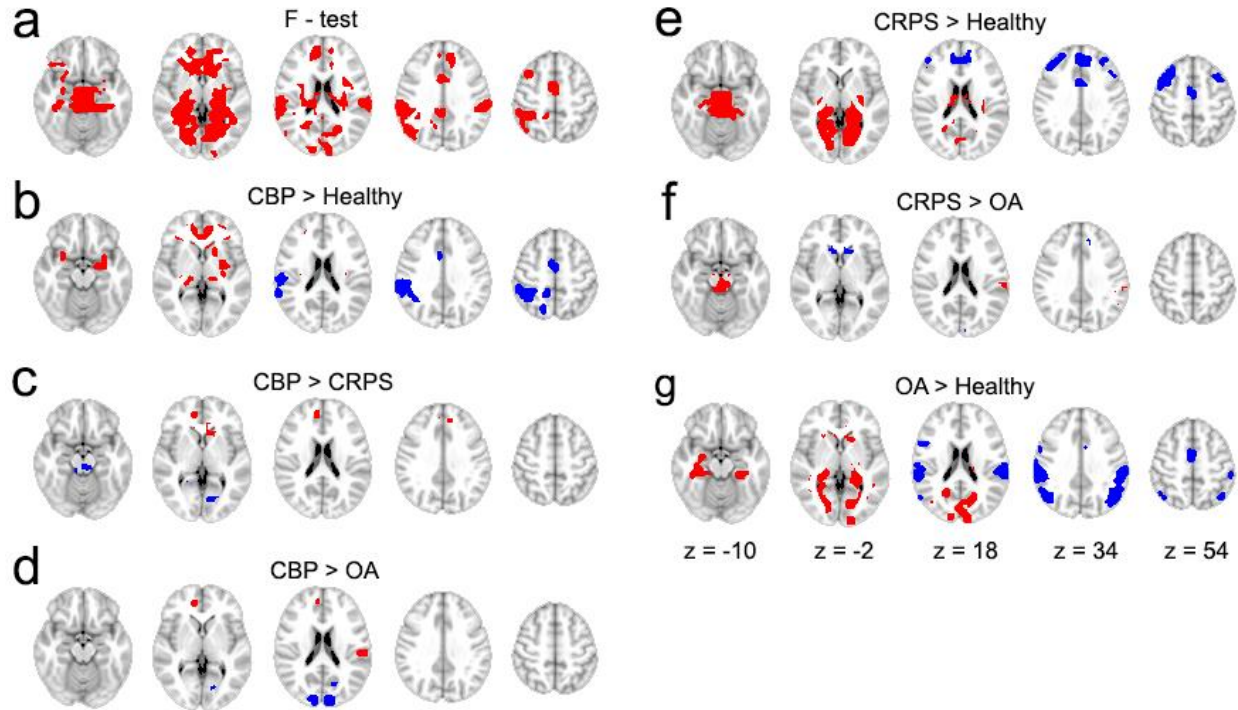

**Supplementary Fig. 5. Nodal degree changes in chronic pain patients.** (a) Brain slices show regions with significant difference in nodal degree across all groups for 10% link density analysis (whole-brain voxel-wise ANCOVA with age and gender as covariates of no interest,  $f$ -zscore  $> 2.3$ ,  $p < 0.01$ , FWE corrected using threshold-free cluster enhancement). (b - g) Brain slices illustrate the nodes that showed significant differences between all possible pair-wise comparisons (patients and our healthy controls) for 10% link density analysis (Tukey post-hoc,  $p < 0.05$  FDR corrected). Red denotes significantly increased degree and blue denotes significantly decreased degree. Brain regions that showed similar changes in all patients compared to healthy controls (Figure 3c) were determined from the conjunction of panels b, e and g. Brain regions that showed CBP-specific nodal degree changes (Figure 3d) were determined from the conjunction of panels b, c and d. Brain regions that showed CRPS-specific nodal degree changes (Figure 3e) were determined from the conjunction of panels c, e and f. Brain regions that showed OA-specific nodal degree changes (Figure 3f) were determined from the conjunction of panels d, f and g. (Coordinates in mm, standard MNI space).

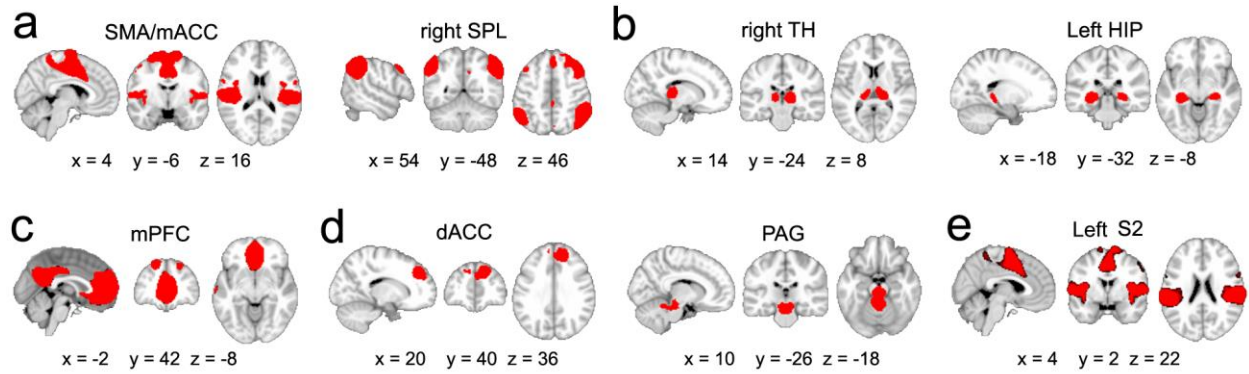

**Supplementary Fig. 6. Resting state functional correlation networks for brain regions showing localized nodal degree changes in patients.** Brain slices show the average resting-state functional correlation maps ( $r > 0.2$ ) for the seed regions in a sample of 1000 subjects from Neurosynth<sup>1</sup>. The seed regions were identified from the regions that showed similar and unique nodal degree changes in patients (**Figure 3c-f**, **Table S6**). **(a)** Brain slices show the functional correlation maps for regions that exhibited common decreases in nodal degree in all patients compared to our healthy subjects. The SMA/mACC region showed extensive connectivity to sensorimotor regions, including bilateral primary and secondary somatosensory regions, motor regions, and posterior portions of the insula. The right SPL showed functional connectivity to brain areas involved in attention, including the posterior parietal regions, parts of the cingulum and right dorsolateral frontal areas. **(b)** Brain slices show the functional correlation maps for regions that exhibited common increases in nodal degree in all patients compared to our healthy subjects. The thalamus connectivity was mainly restricted to the bilateral thalamic nuclei, while the HIP connectivity was mainly localized to the bilateral posterior hippocampus. **(c)** Resting state functional correlation maps for the mPFC seed that exhibited CBP specific nodal degree increases in CBP. The mPFC mainly showed connectivity to brain regions within the DMN. **(d)** The dACC, which exhibited specific nodal degree decreases in CRPS, showed mainly localized connectivity to other frontal regions. On the other hand, the PAG, which showed specific nodal degree increases in CRPS, was mainly connected to brainstem and midbrain regions. **(e)** Resting state functional correlation maps for the left S2 seed that exhibited specific nodal degree decreases in OA. The S2 region showed extensive connectivity to sensorimotor regions, including bilateral primary and secondary somatosensory regions, motor regions and posterior portions of the insula.

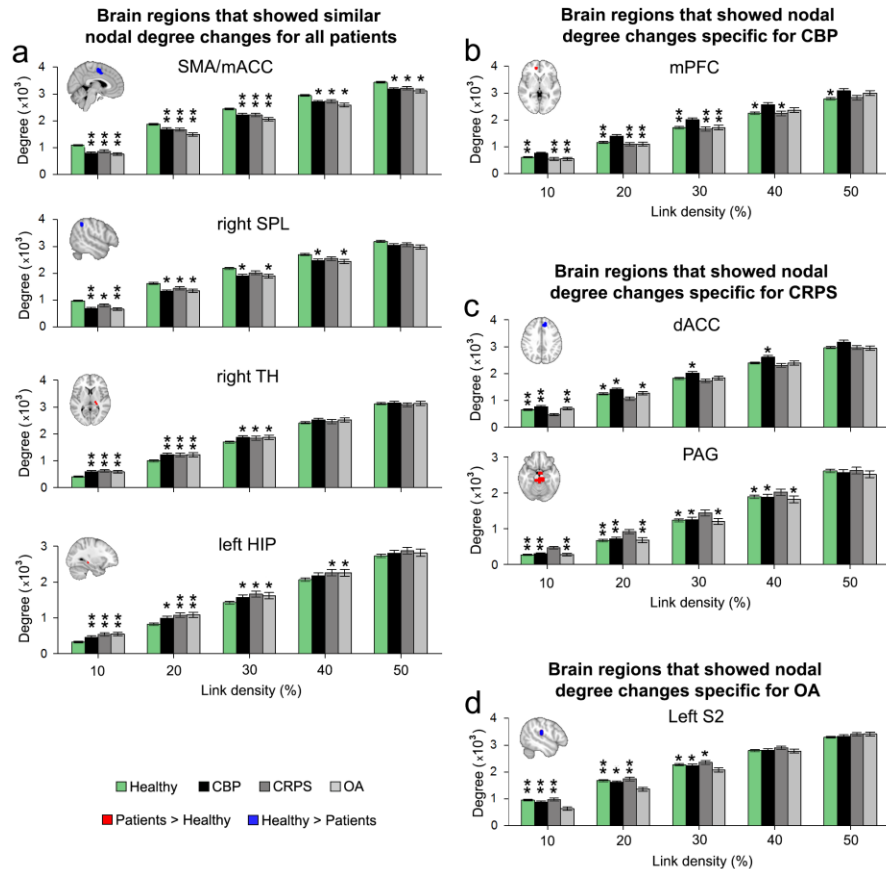

**Supplementary Fig. 7. Nodal degree changes in chronic pain patients show consistency across different link densities (a)** Bars represent the mean  $\pm$  s.e.m of nodal degree for the regions that showed similar increases and decreases in patients compared to healthy controls at all link densities examined (10 – 50%). The mACC (group effect:  $F_{(3, 136)} = 16.12$ ,  $p < 0.0001$ ; group x density effect:  $F_{(12, 544)} = 1.01$ ,  $p = 0.38$ ) and right SPL (group effect:  $F_{(3, 136)} = 8.26$ ,  $p < 0.0001$ ; group x density effect:  $F_{(12, 544)} = 1.49$ ,  $p = 0.12$ ) showed decreased nodal degree in all patients compared to healthy subjects. The right TH (group effect:  $F_{(3, 136)} = 2.69$ ,  $p = 0.04$ ; group x density effect:  $F_{(12, 544)} = 3.71$ ,  $p < 0.0001$ ) and left HIP (group effect:  $F_{(3, 136)} = 3.29$ ,  $p = 0.02$ ; group x density effect:  $F_{(12, 544)} = 1.90$ ,  $p = 0.03$ ) showed increased nodal degree in patients compared to healthy subjects mainly for densities  $\leq 30\%$  (repeated measure ANCOVA with age and gender as covariates of no interest; \* $p < 0.05$ , \*\* $p < 0.01$ , Tukey post - hoc compared to healthy). **(b)** Bars show the mean  $\pm$  s.e.m of nodal degree for brain regions specifically associated with CBP. The mPFC (group effect:  $F_{(3, 136)} = 5.11$ ,  $p = 0.002$ ; group x density effect:  $F_{(12, 544)} = 2.76$ ,  $p = 0.001$ ) showed increased degree in CBP compared to OA, CRPS and healthy subjects mainly for densities  $\leq 30\%$  (repeated measure ANCOVA with age and gender as covariates of no interest; \* $p < 0.05$ , \*\* $p < 0.01$ , Tukey post - hoc compared to CBP). **(c)** Bars show the mean  $\pm$  s.e.m of nodal degree for brain regions specifically associated with CRPS. The dACC (group effect:  $F_{(3, 136)} = 3.88$ ,  $p = 0.011$ ; group x density effect:  $F_{(12, 544)} = 3.77$ ,  $p < 0.0001$ ) showed decreased nodal degree in CRPS compared to CBP, OA and healthy subjects for densities  $\leq 20\%$ . On the other hand, the brainstem (group effect:  $F_{(3, 136)} = 3.85$ ,  $p = 0.010$ ; group x density effect:  $F_{(12, 544)} = 1.87$ ,  $p = 0.03$ ) showed increased nodal degree in CRPS compared to CBP, OA and healthy subjects for densities  $\leq 40\%$  (repeated measure ANCOVA with age and gender as covariates of no interest; \* $p < 0.05$ , \*\* $p < 0.01$ , Tukey post - hoc compared to CRPS) **(d)** Bars show the mean  $\pm$  s.e.m of nodal degree for brain regions specifically associated with OA. The left S2 (group effect:  $F_{(3, 136)} = 2.74$ ,  $p = 0.04$ ; group x density effect:  $F_{(12, 544)} = 8.35$ ,  $p < 0.0001$ ) showed decreased degree in OA compared to CBP, CRPS and healthy subjects only for densities  $\leq 20\%$  (repeated measure ANCOVA with age and gender as covariates of no interest; \* $p < 0.05$ , \*\* $p < 0.01$ , Tukey post-hoc compared to OA). (All  $p$  – values were adjusted for multiple comparisons using Bonferroni correction)



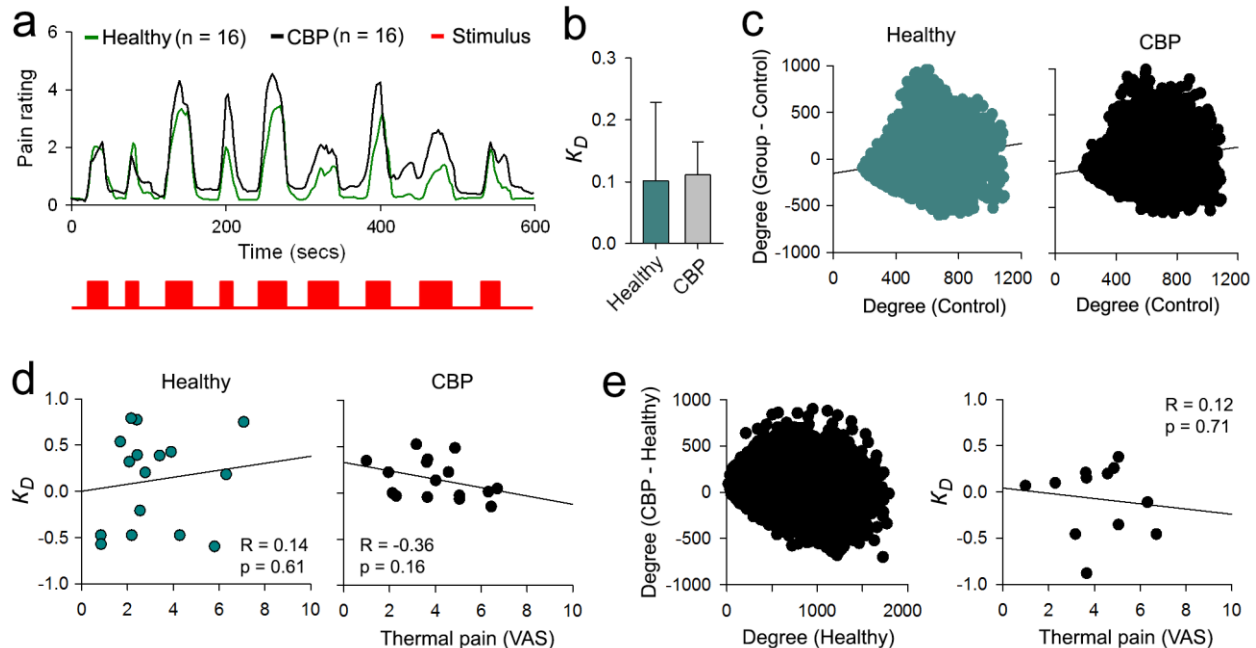

**Supplementary Fig. 8. CBP patients and healthy subjects do not show rank order disruption for acute thermal pain.** (a) Top panel shows average pain ratings for painful heat in CBP ( $n = 12$ , black trace) and gender- and age-matched healthy subjects ( $n = 12$ , green trace) taken from previously published data (see main text). Bottom panel shows the time course of the thermal stimulus (red) applied to the lower back. (b) Bar graph shows the mean  $\pm$  s.e.m  $k_D$  for the thermal task in CBP and healthy compared to the off-site control data for 10% link density. There were no differences between the two groups (Healthy:  $k_D$  mean  $\pm$  s.e.m. =  $0.10 \pm 0.12$ ; CBP:  $k_D$  mean  $\pm$  s.e.m. =  $0.11 \pm 0.06$ ;  $t_{(22)} = 0.18$ ,  $p = 0.84$ , two-sided unpaired t-test). (c) Scatter plots depict the group  $k_D$  for healthy subjects (left plot, green circles) and CBP patients (right plot, black circle) compared to the off-site control group for 10% link density. (d) Scatter plots show the relationship between  $k_D$  and thermal pain intensity at the time of the scan healthy subjects (left plot, green circles) and CBP patients (right plot, black circles).  $k_D$  showed no significant relationship with thermal pain intensity in healthy subjects ( $R = 0.14$ ,  $p = 0.61$ ) or CBP ( $R = -0.36$ ,  $p = 0.16$ ). (e) We also computed  $k_D$  of functional networks in CBP during thermal task in relation to healthy subjects during the thermal task. CBP did not exhibit any significant  $k_D$  compared to healthy subjects during thermal pain (Healthy:  $k_D$  mean  $\pm$  s.e.m. =  $0.00 \pm 0.09$ ; CBP:  $k_D$  mean  $\pm$  s.e.m. =  $-0.08 \pm 0.11$ ;  $t_{(22)} = -0.54$ ,  $p = 0.59$ , two-sided unpaired t-test). The left scatter plot shows the group  $k_D$  for CBP patients during thermal task compared to healthy subjects for 10% link density. The right scatter plot illustrates the relationship between thermal pain intensity and  $k_D$  in the CBP group. We did not observe any significant relationship ( $R = -0.12$ ,  $p = 0.71$ ).

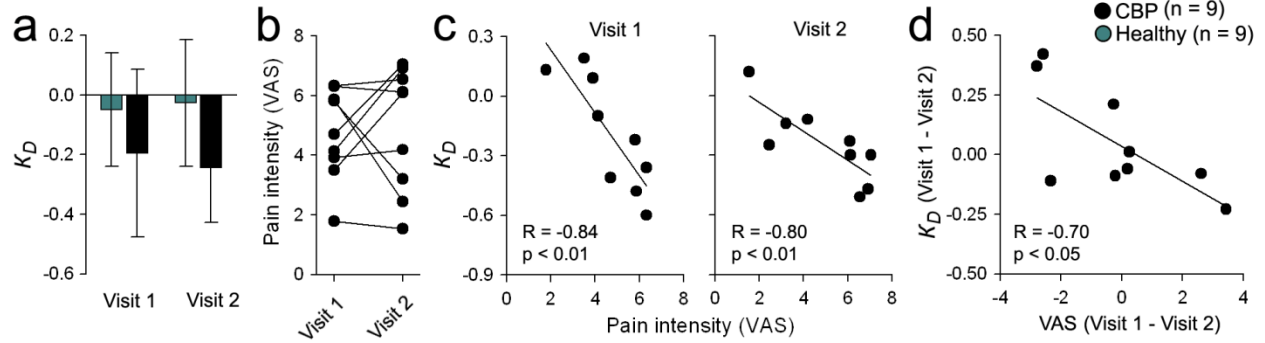

**Supplementary Fig. 9. Degree rank order disruption in patients shows temporal reliability over a six-month period** (a) Mean  $\pm$  s.e.m. for  $k_D$  in CBP and healthy controls for visit 1 (baseline) and visit 2 (6 months later). The  $k_D$  values for all groups were computed in relation to the mean degree map of the offsite healthy controls. On average, CBP showed more negative  $k_D$  compared to matched healthy controls ( $F_{(1,14)} = 3.98$ ,  $p = 0.061$ , repeated measure ANCOVA with age and gender as covariates of no interest). (b) Graph depicts the individual changes in reported spontaneous pain intensity (gray circles) in CBP patients for visits 1 and 2. Despite the individual variability, the group average pain rating was similar for both visits (paired t - test,  $t_{(8)} = -0.26$ ,  $p = 0.79$ ). (c)  $k_D$  and back pain intensity exhibited a strong relationship at visit 1 (left scatter,  $R = -0.84$ ,  $p = 0.005$ ) and visit 2 (right scatter,  $R = -0.80$ ,  $p = 0.006$ ). (d) Within - subjects changes in  $k_D$  showed a significant relationship with corresponding changes in back pain intensity ( $R = -0.70$ ,  $p = 0.017$ ).

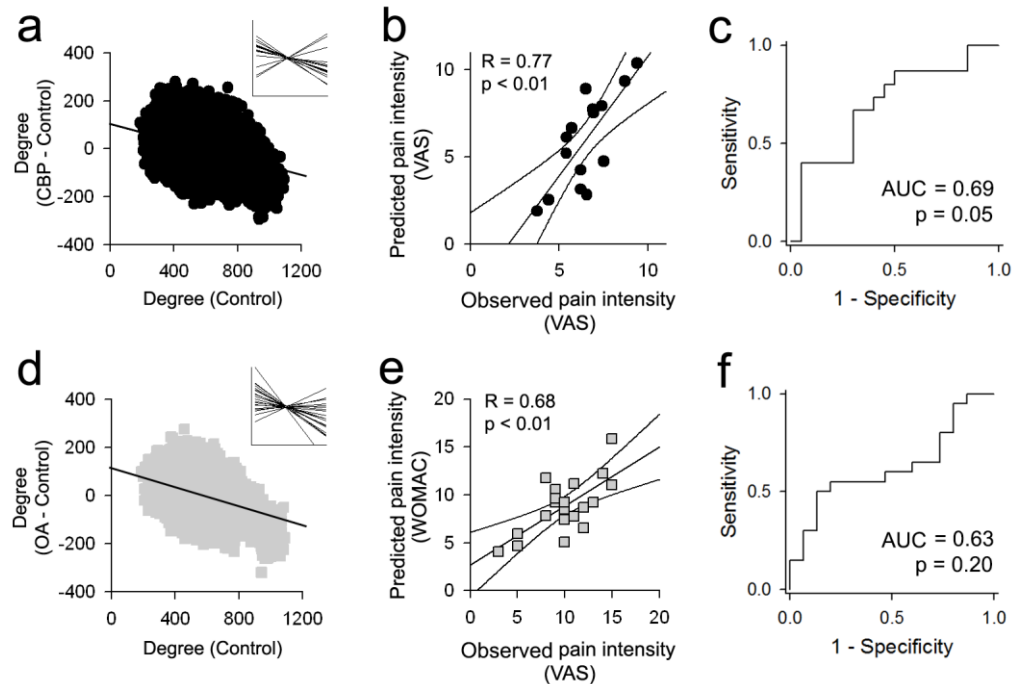

**Supplementary Fig. 10. Degree rank order disruption accurately predicts pain intensity in two novel groups of chronic pain patients.** Predicted VAS and WOMAC pain intensity scores for the new CBP and OA patients were derived from linear correlations shown in **Fig. 1e**. Accuracy of prediction was assessed using a correlation analysis between the predicted values and the observed values for each group independently. **(a)** Scatter plot shows the degree rank order disruption in CBP ( $n = 15$ ) for 10% link density. Top right insert shows  $k_D$  computed for each CBP patient. Group and individual  $k_D$  values were computed with respect to the off-site control group. **(b)** Scatter plot shows association between predicted and observed pain intensity as measured by the VAS scale. Predicted and observed values showed a highly significant relationship ( $R = 0.77$ ,  $p = 0.004$ ). **(c)** ROC curve and discrimination probability (AUC, area under the curve) for predicting CBP pain intensity in the novel group of patients based on mPFC nodal degree from **Figure 3d**. Nodal degree of mPFC was able to significantly discriminate CBP from OA patients in the novel group of patients ( $AUC = 0.69$ ,  $p = 0.05$ ). **(d)** Rank order disruption in the new OA patients ( $n = 20$ ) for 10% link density. Top right insert shows  $k_D$  computed for each OA patient. **(e)** Scatter plot depicts high positive correlation between predicted and observed pain intensity as measured by the WOMAC scale in these OA patients ( $R = 0.68$ ,  $p = 0.001$ ). **(f)** ROC curve and discrimination probability for predicting OA pain intensity in the novel group of patients based on S2 nodal degree from **Figure 3f**. Nodal degree of S2 was unable to significantly discriminate OA from CBP patients in the novel group of patients ( $AUC = 0.63$ ,  $p = 0.20$ ). ROC curves were also computed using both mPFC and S2 degree in the same model. Nodal degree of mPFC and S2 were able to discriminate CBP and OA patients in the novel group of patients ( $AUC = 0.72$ ,  $p = 0.012$ , data not shown).

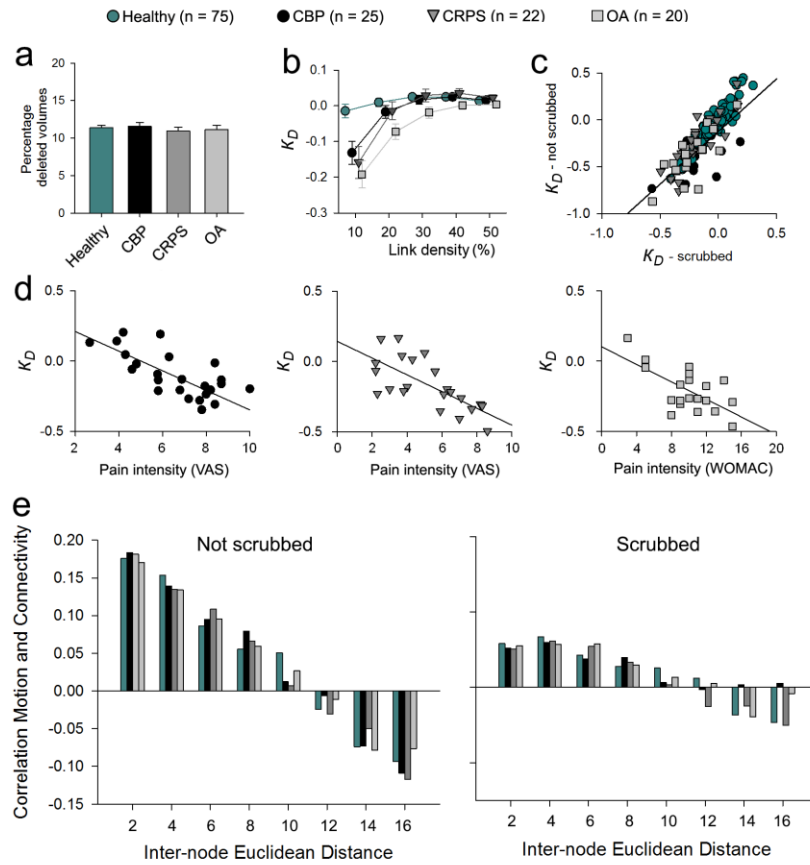

**Supplementary Fig. 11. The effect of data scrubbing on degree rank order disruption ( $k_D$ ).** In order to determine the contribution of head motion to  $k_D$ , we reanalyzed all data presented in Fig. 1 after performing a within-subject, censoring-based artifact removal strategy based on volume censoring following the exact procedures described by Power et al.<sup>2</sup>. Framewise displacement (calculated as the sum of the absolute values of the differentiated realignment estimates at every timepoint), DVARS (calculated as the root mean square value of the differentiated BOLD timeseries within the whole brain at every timepoint), and the standard deviation of the BOLD signal across all voxels within the brain at every timepoint were used to identify brain volumes with high noise that were subsequently removed during preprocessing for all offsite controls, healthy subjects and patients. Individual subjects'  $k_D$  values were then recomputed as described in the main manuscript. **(a)** Bar graphs show mean  $\pm$  s.e.m of percentage of number of timepoints removed by scrubbing. Overall, around 10% of the time series were removed for healthy and all patient groups ( $F_{(3,136)} = 0.29$ ,  $p = 0.83$ ). **(b)** Mean  $\pm$  s.e.m. of  $k_D$  in our healthy subjects and patients across all link densities. Similar to our original observations, patient groups exhibited significant degree rank order disruption compared to off-site healthy controls (group effect:  $F_{(3,136)} = 5.93$ ,  $p < 0.001$ ), with the most significant differences observed for link density = 10 %. **(c)**  $k_D$  values (link density = 10%) before and after scrubbing show high correlation across all subjects ( $R = 0.88$ ,  $p < 0.0001$ ). **(d)**  $k_D$  still showed a significant relationship to pain intensity in CBP ( $R = -0.74$ ,  $p < 0.001$ ), CRPS ( $R = -0.70$ ,  $p < 0.001$ ) and OA ( $R = -0.64$ ,  $p = 0.002$ ), at 10% link density. **(e)** Bar graph shows the relationship between motion and connectivity (correlation coefficient) as a function of inter-node distances for our healthy controls and all patient groups. Similar to previous results, motion tends to increase connectivity for adjacent nodes and decrease connectivity between distant nodes (left plot). This relationship was significantly reduced after scrubbing (right plot). Group differences between the motion and connectivity correlation at different distances were examined using the Fisher exact test. There were no significant differences between any pair of groups at any given distance (all  $p$ -values  $> 0.22$ ). The results show that a more aggressive correction for motion and noise still preserves rank order disruption in all patient groups.

| Subject | Volumes | TR<br>(seconds) | Slices | Age<br>(years) | Gender | BDI | Pain duration<br>(years) | VAS  |
|---------|---------|-----------------|--------|----------------|--------|-----|--------------------------|------|
| CBP01   | 305     | 2.5             | 40     | 51             | F      | 15  | 1                        | 8    |
| CBP02   | 305     | 2.5             | 40     | 62             | M      | 1   | 38                       | 8.7  |
| CBP03   | 305     | 2.5             | 40     | 49             | F      | 12  | 14                       | 8.4  |
| CBP04   | 305     | 2.5             | 40     | 62             | F      | 13  | 2                        | 8.4  |
| CBP05   | 305     | 2.5             | 40     | 60             | F      | 8   | 30                       | 10   |
| CBP06   | 305     | 2.5             | 40     | 46             | M      | 13  | 11                       | 5.9  |
| CBP07   | 305     | 2.5             | 40     | 49             | M      | 4   | 41                       | 6.3  |
| CBP08   | 305     | 2.5             | 40     | 32             | M      | 5   | 12                       | 7.8  |
| CBP09   | 305     | 2.5             | 40     | 41             | M      | 3   | 15                       | 7.7  |
| CBP10   | 305     | 2.5             | 40     | 48             | M      | 12  | 1                        | 8.7  |
| CBP11   | 305     | 2.5             | 40     | 44             | M      | 0   | 18                       | 9.8  |
| CBP12   | 244     | 2.5             | 40     | 42             | M      | 2   | 15                       | 5.8  |
| CBP13   | 244     | 2.5             | 40     | 39             | F      | 0   | 10                       | 4.6  |
| CBP14   | 244     | 2.5             | 40     | 56             | F      | 0   | 11                       | 4.3  |
| CBP15   | 244     | 2.5             | 40     | 47             | M      | 0   | 32                       | 7.94 |
| CBP16   | 244     | 2.5             | 40     | 58             | M      | 10  | 20                       | 6.89 |
| CBP17   | 244     | 2.5             | 40     | 52             | M      | 0   | 1                        | 4.2  |
| CBP18   | 244     | 2.5             | 40     | 41             | F      | 0   | 25                       | 3.9  |
| CBP19   | 244     | 2.5             | 40     | 49             | F      | 0   | 7                        | 5.8  |
| CBP20   | 244     | 2.5             | 40     | 52             | M      | 4   | 37                       | 7.2  |
| CBP21   | 244     | 2.5             | 40     | 52             | F      | 5   | 15                       | 2.7  |
| CBP22   | 244     | 2.5             | 40     | 48             | M      | 2   | 10                       | 4.8  |
| CBP23   | 244     | 2.5             | 40     | 40             | F      | 10  | 7                        | 6.8  |
| CBP24   | 244     | 2.5             | 40     | 48             | F      | 19  | 10                       | 8.21 |
| CBP25   | 244     | 2.5             | 40     | 21             | F      | 19  | 11                       | 5.8  |

**Table S1. Demographics, scan parameters and pain characteristics of CBP subjects studied.** BDI is Beck's Depression Index, which is higher than healthy subjects, but all CBP would be classified as moderate or low depression. VAS is visual analog scale. It is used to determine intensity of back pain (0-10 scale).

| Subject | Volumes | TR<br>(seconds) | Slices | Age<br>(years) | Gender | BDI | Pain duration<br>(years) | VAS |
|---------|---------|-----------------|--------|----------------|--------|-----|--------------------------|-----|
| CRPS01  | 305     | 2.5             | 40     | 61             | F      | 6   | 0.25                     | 8.2 |
| CRPS02  | 305     | 2.5             | 40     | 61             | M      | 4   | 9.75                     | 8.6 |
| CRPS03  | 305     | 2.5             | 40     | 56             | M      | 12  | 0.25                     | 2.2 |
| CRPS04  | 305     | 2.5             | 40     | 48             | M      | 13  | 1.42                     | 2.5 |
| CRPS05  | 305     | 2.5             | 40     | 40             | M      |     |                          | 4.0 |
| CRPS06  | 305     | 2.5             | 40     | 25             | F      | 13  | 1.92                     | 6.3 |
| CRPS07  | 305     | 2.5             | 40     | 26             | F      | 13  | 0.42                     | 2.2 |
| CRPS08  | 305     | 2.5             | 40     | 26             | F      | 8   | 1                        | 4.3 |
| CRPS09  | 305     | 2.5             | 40     | 27             | F      |     |                          | 3.5 |
| CRPS10  | 305     | 2.5             | 40     | 28             | F      | 7   | 1.6                      | 2.3 |
| CRPS11  | 305     | 2.5             | 40     | 31             | F      | 5   | 0.25                     | 3.8 |
| CRPS12  | 305     | 2.5             | 40     | 32             | F      | 5   | 1.75                     | 6.1 |
| CRPS13  | 305     | 2.5             | 40     | 39             | F      | 9   | 1.33                     | 6.5 |
| CRPS14  | 305     | 2.5             | 40     | 40             | F      | 10  | 13.5                     | 8.3 |
| CRPS15  | 305     | 2.5             | 40     | 41             | F      |     |                          | 5.9 |
| CRPS16  | 305     | 2.5             | 40     | 43             | F      | 14  | 5.08                     | 5.6 |
| CRPS17  | 305     | 2.5             | 40     | 47             | F      | 13  | 7.33                     | 7.1 |
| CRPS18  | 305     | 2.5             | 40     | 48             | F      |     |                          | 3.0 |
| CRPS19  | 305     | 2.5             | 40     | 50             | F      |     |                          | 5.0 |
| CRPS20  | 305     | 2.5             | 40     | 53             | F      | 5   | 0.25                     | 7.7 |
| CRPS21  | 305     | 2.5             | 40     | 59             | F      |     |                          | 7.0 |
| CRPS22  | 305     | 2.5             | 40     | 52             | F      |     |                          | 3.7 |

**Table S2. Demographics, scan parameters and pain characteristics of CRPS subjects studied.** BDI = Beck's Depression Index; VAS = visual analog scale

| Subject | Volumes | TR<br>(seconds) | Slices | Age<br>(years) | Gender | BDI | Pain duration<br>(years) | VAS | WOMAC<br>(pain) |
|---------|---------|-----------------|--------|----------------|--------|-----|--------------------------|-----|-----------------|
| OA01    | 305     | 2.5             | 40     | 49             | M      | 9   | 10                       | 7.1 | 8.0             |
| OA02    | 305     | 2.5             | 40     | 53             | M      | 7   | 36                       | 8.3 | 5.5             |
| OA03    | 305     | 2.5             | 40     | 66             | M      | 1   |                          | 2.1 | 5.0             |
| OA04    | 305     | 2.5             | 40     | 51             | M      | 22  | 14                       | 9.0 | 7.5             |
| OA05    | 305     | 2.5             | 40     | 56             | F      | 13  | 6                        | 5.6 | 5.0             |
| OA06    | 305     | 2.5             | 40     | 42             | M      | 9   | 5                        | 5.7 | 9.50            |
| OA07    | 305     | 2.5             | 40     | 53             | M      | 0   | 11                       | 7.0 | 12.0            |
| OA08    | 305     | 2.5             | 40     | 52             | F      | 14  | 4                        | 8.8 | 6.5             |
| OA09    | 300     | 2.5             | 40     | 51             | M      | 14  | 1                        | 7.0 | 7.0             |
| OA10    | 300     | 2.5             | 40     | 57             | F      | 10  | 6                        | 5.0 | 11.0            |
| OA11    | 300     | 2.5             | 40     | 52             | F      | 10  | 2                        | 8.0 | 9.0             |
| OA12    | 300     | 2.5             | 40     | 62             | F      | 6   | 5                        | 7.0 | 4.5             |
| OA13    | 300     | 2.5             | 40     | 48             | M      | 9   | 10                       | 7.0 | 12.0            |
| OA14    | 300     | 2.5             | 40     | 56             | F      | 2   | 6                        | 5.0 | 5.0             |
| OA15    | 300     | 2.5             | 40     | 53             | M      | 2   | 30                       | 6.0 | 7.0             |
| OA16    | 300     | 2.5             | 40     | 64             | F      | 7   | 12                       | 8.0 | 7.5             |
| OA17    | 300     | 2.5             | 40     | 54             | F      | 0   | 25                       | 9.0 | 10.0            |
| OA18    | 300     | 2.5             | 40     | 45             | M      | 1   | 1.5                      | 7.0 | 7.0             |
| OA19    | 300     | 2.5             | 40     | 61             | M      | 3   | 3                        | 7.0 | 10.0            |
| OA20    | 300     | 2.5             | 40     | 58             | M      | 8   | 6                        | 6.0 | 8.0             |

**Supplementary Table 3. Demographics, scan parameters and pain characteristics of OA subjects studied.** BDI = Beck's Depression Index; VAS = visual analog scale; WOMAC = Western Ontario and McMaster Universities Osteoarthritis Index

| Dataset     | Number of subjects | Volumes | TR (seconds) | Slices | Age (years)   | Gender      |
|-------------|--------------------|---------|--------------|--------|---------------|-------------|
| Cleveland   | 30                 | 127     | 2.8          | 31     | 43.23 ± 11.18 | 11 M / 19 F |
| Dallas      | 23                 | 115     | 2.0          | 36     | 42.21 ± 20.41 | 11 M / 12 F |
| Milwaukee_b | 46                 | 175     | 2.0          | 64     | 53.58 ± 5.79  | 15 M / 31 F |
| Orangeburg  | 17                 | 165     | 2.0          | 22     | 40.59 ± 10.99 | 12 M / 5 F  |
| Pittsburgh  | 13                 | 275     | 1.5          | 29     | 38.84 ± 9.41  | 7 M / 6 F   |

**Supplementary Table 4. Demographics, scan parameters for the off-site connectome1000 control group.** TR = time to repetition; M = male; F = female. Age reported as mean ± standard deviation.



| % Link density | Healthy     | CBP             | CRPS           | OA             |
|----------------|-------------|-----------------|----------------|----------------|
| 10             | 0.00 ± 0.03 | -0.25 ± 0.05 ** | -0.21 ± 0.06** | -0.36 ± 0.06** |
| 20             | 0.03 ± 0.04 | -0.14 ± 0.06*   | -0.08 ± 0.08*  | -0.23 ± 0.07** |
| 30             | 0.10 ± 0.04 | 0.00 ± 0.07     | 0.09 ± 0.08    | -0.06 ± 0.08   |
| 40             | 0.14 ± 0.05 | 0.11 ± 0.08     | 0.17 ± 0.09    | 0.04 ± 0.09    |
| 50             | 0.13 ± 0.05 | 0.18 ± 0.08     | 0.20 ± 0.09    | 0.09 ± 0.10    |

**Supplementary Table 5. Chronic pain is associated with degree rank order disruption ( $k_D$ ) of whole brain functional networks.** Table lists the mean  $\pm$  s.e.m of  $k_D$  for all the groups at all link densities studied (10 - 50%). Individual  $k_D$  values were computed with respect to the mean off-site healthy controls. 'Healthy' are our own controls relative to off-site control. Differences between groups were determined using a repeated measure ANCOVA with age and gender as covariates of no interest. Differences between patients and healthy subjects were determined using a Tukey post – hoc. All patient groups showed significant degree rank order disruption compared to healthy at 10 and 20% link densities (\*p < 0.05; \*\*p < 0.01, Tukey post - hoc compared to healthy).

| Region    | Condition                              | Cluster size | Coordinates (mm)         |
|-----------|----------------------------------------|--------------|--------------------------|
| SMA/mACC  | Decreased nodal degree (all patients)  | 14 nodes     | x = 4, y = -2, z = 48    |
| Right SPL | Decreased nodal degree (all patients)  | 3 nodes      | x = 54, y = -48, z = 44  |
| Right TH  | Increased nodal degree (all patients)  | 14 nodes     | x = 22, y = -28, z = 6   |
| Left HIP  | Increased nodal degree (all patients)  | 5 nodes      | x = -28, y = -30, z = -6 |
| mPFC      | Increased nodal degree (CBP specific)  | 3 nodes      | x = -6, y = 48, z = -2   |
| dACC      | Decreased nodal degree (CRPS specific) | 2 nodes      | x = 14, y = 42, z = 36   |
| PAG       | Increased nodal degree (CRPS specific) | 4 nodes      | x = 0, y = -28, z = -18  |
| Left S2   | Decreased nodal degree (OA specific)   | 3 nodes      | x = -14, y = 16, z = -2  |

**Supplementary Table 6. Anatomical localization of nodal degree changes.** Table lists the cluster size (number of nodes) and MNI coordinates (mm) for the brain regions that showed similar and unique functional connectivity changes in CBP, CRPS and OA.

| Independent parameter  | Correlation  | P - value |
|------------------------|--------------|-----------|
| Age                    | 0.171        | 0.197     |
| Gender                 | 0.058        | 0.663     |
| Duration               | 0.256        | 0.06      |
| BDI                    | -0.110       | 0.407     |
| $k_D$                  | -0.503 **/++ | <0.0001   |
| NMI                    | -0.378 **/+  | 0.003     |
| Clustering coefficient | -0.098       | 0.459     |
| Global efficiency      | 0.024        | 0.856     |
| Degree mACC            | -0.30 *      | 0.022     |
| Degree right SPL       | -0.21        | 0.117     |
| Degree right TH        | 0.44 **/++   | <0.0001   |
| Degree left HIP        | 0.31*        | 0.018     |
| Degree mPFC            | 0.18         | 0.176     |
| Degree dACC            | -0.03        | 0.847     |
| Degree brainstem       | 0.27*        | 0.037     |
| Degree left S2         | -0.16        | 0.235     |

**Supplementary Table 7. Correlation of chronic pain intensity with demographic, clinical, and brain network parameters.** Table lists the correlation of pain intensity across all patients (n = 67) with various parameters. All CBP (n = 25), CRPS (n = 22) and OA (n = 20) patients were included in the analysis (\*p<0.05, \*\*p<0.01 uncorrected; +p<0.05, ++p<0.01 Bonferroni corrected for multiple comparisons). BDI = Beck's depression inventory; DMN = default – mode network; mPFC = medial prefrontal cortex; NMI = normalized mutual information.

|                          | beta  | t - score | P - value |
|--------------------------|-------|-----------|-----------|
| <b>Forward stepwise</b>  |       |           |           |
| $k_D$                    | -0.39 | -4.51     | <0.0001   |
| Duration                 | 0.20  | 1.91      | 0.061     |
| Degree right TH          | 0.21  | 1.74      | 0.087     |
| Degree left S2           | -0.17 | -1.64     | 0.11      |
| <b>Backward stepwise</b> |       |           |           |
| $k_D$                    | -0.50 | -4.40     | <0.0001   |

**Supplementary Table 8. Multiple regression of chronic pain intensity with demographic, clinical and brain network parameters.** Supplementary Table shows the regression summary for the forward ( $R^2 = 0.38$ ,  $F_{(4,54)} = 8.17$ ,  $p < 0.0001$ ) and backward ( $R^2 = 0.25$ ,  $F_{(1,55)} = 19.33$ ,  $p < 0.0001$ ) stepwise multiple regression analysis of pain intensity(normalized between 0 – 1) with all brain, demographic and clinical parameters list in **Supplementary Table 7**. All CBP ( $n = 25$ ), CRPS ( $n = 22$ ) and OA ( $n = 20$ ) patients were included in the analysis. Pain intensity showed significant association only with  $k_D$  in both models.

| Subject | Volumes | TR (seconds) | Slices | Age (years) | Gender | Pain duration (weeks) | BDI (visit 1) | BDI (visit 2) | BDI (visit 3) | VAS (visit 1) | VAS (visit 2) | VAS (visit 3) |
|---------|---------|--------------|--------|-------------|--------|-----------------------|---------------|---------------|---------------|---------------|---------------|---------------|
| SBP01   | 244     | 2.5          | 40     | 48          | F      | 7                     | 1             | 2             | 1             | 6.1           | 5.4           | 5.9           |
| SBP02   | 244     | 2.5          | 40     | 43          | M      | 9                     | 0             | 0             | 1             | 7.3           | 6.5           | 6.1           |
| SBP03   | 244     | 2.5          | 40     | 57          | F      | 12                    | 2             | 2             | 1             | 8.8           | 3.5           | 6.2           |
| SBP04   | 244     | 2.5          | 40     | 56          | M      | 14                    | 0             | 1             | 0             | 7.8           | 7.0           | 8.1           |
| SBP05   | 244     | 2.5          | 40     | 49          | M      | 8                     | 0             | 0             | 1             | 8.0           | 3.4           | 5.0           |
| SBP06   | 244     | 2.5          | 40     | 56          | M      | 12                    | 0             | 0             | 0             | 2.3           | 3.9           | 6.1           |
| SBP07   | 244     | 2.5          | 40     | 49          | F      | 16                    | 6             | 5             | 3             | 7.7           | 8.2           | 8.7           |
| SBP08   | 244     | 2.5          | 40     | 31          | M      | 10                    | 0             | 2             | 3             | 6.4           | 7.9           | 7.2           |
| SBP09   | 244     | 2.5          | 40     | 44          | M      | 8                     | 1             | 1             | 0             | 6.1           | 7.3           | 7.0           |
| SBP10   | 244     | 2.5          | 40     | 47          | F      | 12                    | 2             | 1             | 0             | 7.6           | 8.6           | 8.6           |
| SBP11   | 244     | 2.5          | 40     | 51          | F      | 12                    | 0             | 0             | 1             | 3.6           | 4.9           | 2.5           |
| SBP12   | 244     | 2.5          | 40     | 33          | F      | 11                    | 0             | 1             | 0             | 7.6           | 6.9           | 6.1           |

**Supplementary Table 9. Demographics, scan parameters, and pain characteristics of SBP subjects studied over one year.** Healthy controls matched for age and gender were selected from the healthy subject group (see Supplementary Table 2). SBP patients showed no change in reported back pain intensity ( $F_{(2,22)} = 0.44$ ,  $p = 0.65$ , repeated measure ANOVA) and BDI ( $F_{(2,22)} = 0.49$ ,  $p = 0.61$ , repeated measure ANOVA) across the 3 visits.

| Subject | Volumes | TR<br>(seconds) | Slices | Age<br>(years) | Gender | BDI | Pain duration<br>(years) | VAS |
|---------|---------|-----------------|--------|----------------|--------|-----|--------------------------|-----|
| CBP01   | 305     | 2.5             | 40     | 54             | F      | 6   | 8                        | 7.5 |
| CBP02   | 305     | 2.5             | 40     | 50             | M      | 4   | 30                       | 6.9 |
| CBP03   | 305     | 2.5             | 40     | 54             | M      | 4   | 30                       | 6.2 |
| CBP04   | 305     | 2.5             | 40     | 62             | M      | 3   | 25                       | 7.4 |
| CBP05   | 305     | 2.5             | 40     | 52             | M      | 6   | 5                        | 5.7 |
| CBP06   | 305     | 2.5             | 40     | 54             | M      | 4   | 30                       | 6.2 |
| CBP07   | 305     | 2.5             | 40     | 58             | M      | 9   | 10                       | 5.4 |
| CBP08   | 244     | 2.5             | 40     | 45             | M      | 8   | 10                       | 8.7 |
| CBP09   | 244     | 2.5             | 40     | 44             | M      | 0   | 16                       | 9.4 |
| CBP10   | 244     | 2.5             | 40     | 48             | M      | 3   | 12                       | 3.8 |
| CBP11   | 244     | 2.5             | 40     | 49             | M      | 17  | 7                        | 6.5 |
| CBP12   | 244     | 2.5             | 40     | 39             | M      | 5   | 7                        | 4.4 |
| CBP13   | 244     | 2.5             | 40     | 51             | F      | 5   | 6                        | 5.4 |
| CBP14   | 244     | 2.5             | 40     | 51             | M      | 20  | 8                        | 6.5 |
| CBP15   | 244     | 2.5             | 40     | 55             | F      | 2   | 20                       | 6.9 |

**Supplementary Table 10. Demographics, scan parameters and pain characteristics of CBP subjects used in the validation analysis.** BDI is Beck's Depression Index, which is higher than healthy subjects, but all CBP would be classified as moderate or low depression. VAS is visual analog scale. It is used to determine intensity of back pain (0-10 scale).

| Subject | Volumes | TR (seconds) | Slices | Age (years) | Gender | BDI | Pain duration (years) | VAS  | WOMAC (pain) |
|---------|---------|--------------|--------|-------------|--------|-----|-----------------------|------|--------------|
| OA01    | 300     | 2.5          | 40     | 60          | M      | 5   | 4                     | 3.0  | 3            |
| OA02    | 300     | 2.5          | 40     | 54          | F      |     | 6                     | 7.0  | 11           |
| OA03    | 300     | 2.5          | 40     | 59          | F      | 2   | 8                     | 5.0  | 9            |
| OA04    | 300     | 2.5          | 40     | 50          | M      | 1   | 35                    | 7.0  | 5            |
| OA05    | 300     | 2.5          | 40     | 61          | F      | 3   | 23                    | 3.0  | 8            |
| OA06    | 300     | 2.5          | 40     | 45          | F      | 0   | 11                    | 10.0 | 15           |
| OA07    | 300     | 2.5          | 40     | 58          | F      | 2   | 15                    | 8.0  | 13           |
| OA08    | 300     | 2.5          | 40     | 48          | F      | 2   | 13                    | 7.0  | 5            |
| OA09    | 300     | 2.5          | 40     | 60          | F      | 14  | 4                     | 4.0  | 12           |
| OA10    | 300     | 2.5          | 40     | 66          | M      | 14  | 9                     | 7.0  | 10           |
| OA11    | 300     | 2.5          | 40     | 45          | F      | 0   | 5                     | 7.0  | 10           |
| OA12    | 300     | 2.5          | 40     | 59          | F      | 4   | 3                     | 4.5  | 9            |
| OA13    | 300     | 2.5          | 40     | 66          | M      | 11  | 6                     | 7.0  | 9            |
| OA14    | 300     | 2.5          | 40     | 59          | M      | 0   | 27                    | 6.0  | 10           |
| OA15    | 300     | 2.5          | 40     | 49          | M      | 3   | 7                     | 10.0 | 11           |
| OA16    | 300     | 2.5          | 40     | 57          | F      | 0   | 4                     | 8.0  | 15           |
| OA17    | 300     | 2.5          | 40     | 60          | F      | 2   | 2                     | 7.0  | 10           |
| OA18    | 300     | 2.5          | 40     | 49          | M      | 16  | 30                    | 7.0  | 14           |
| OA19    | 300     | 2.5          | 40     | 63          | F      | 11  | 26                    | 7.0  | 12           |
| OA20    | 300     | 2.5          | 40     | 64          | M      | 2   | 30                    | 5.0  | 8            |

**Supplementary Table 11. Demographics, scan parameters and pain characteristics of OA subjects used in the validation analysis.** BDI = Beck's Depression Index; F = female; M=male; VAS = visual analog scale; WOMAC = Western Ontario and McMaster Universities Osteoarthritis Index. Three of these subjects have high depression.

| Analysis              | Groups            | Figure | Motion (mm)<br>Mean (s.e.m) | Correlation (motion- $k_D$ )<br>r-value (p-value) | Statistics                           |
|-----------------------|-------------------|--------|-----------------------------|---------------------------------------------------|--------------------------------------|
| Chronic pain Patients | CBP               | Fig 1d | 0.73(0.05)                  | -0.13(0.64)                                       | $F_{(3,136)} = 1.54$<br>$p = 0.19$   |
|                       | CRPS              | Fig 1d | 0.53(0.06)                  | 0.24(0.26)                                        |                                      |
|                       | OA                | Fig 1d | 0.71(0.05)                  | -0.10(0.69)                                       | ANOVA                                |
|                       | Healthy           | Fig 1d | 0.54(0.07)                  | 0.08(0.19)                                        |                                      |
| Longitudinal SBP      | SBP (visit 1)     | Fig 6b | 0.67(0.06)                  | 0.24(0.44)                                        | $F_{(2,22)} = 0.63$<br>$p = 0.70,$   |
|                       | SBP (visit 2)     | Fig 6b | 0.71(0.07)                  | 0.11(0.72)                                        |                                      |
|                       | SBP (visit 3)     | Fig 6b | 0.60(0.05)                  | -0.23(0.44)                                       |                                      |
|                       | Healthy (visit 1) | Fig 6b | 0.68(0.08)                  | -0.13(0.68)                                       | repeated measure ANOVA               |
|                       | Healthy (visit 2) | Fig 6b | 0.67(0.05)                  | 0.05(0.84)                                        |                                      |
|                       | Healthy (visit 3) | Fig 6b | 0.71(0.09)                  | 0.23(0.44)                                        |                                      |
| Longitudinal CBP      | CBP (visit 1)     | Fig S8 | 0.49(0.09)                  | 0.22 (0.58)                                       | $(F(1,14) = 0.98$                    |
|                       | CBP (visit 2)     | Fig S8 | 0.53(0.11)                  | 0.60 (0.12)                                       |                                      |
|                       | Healthy (visit 1) | Fig S8 | 0.48(0.06)                  | -0.12 (0.68)                                      | $p = 0.52$<br>repeated measure ANOVA |
|                       | Healthy (visit 2) | Fig S8 | 0.52(0.09)                  | 0.06 (0.83)                                       |                                      |
| Validation            | CBP               | Fig S9 | 0.57(0.06)                  | -0.12(0.60)                                       |                                      |
|                       | OA                | Fig S9 | 0.60(0.07)                  | 0.01(0.99)                                        |                                      |

**Supplementary Table 12. No relationship observed between head movement and rank order disruption index.** Individual subject head motion was estimated from the translational and rotational parameters obtained by a rigid body transformation of functional volumes relative to its position mid-way through the scan using the MCFLIRT program, part of the FSL software package. Additionally, head motion time courses were regressed out as covariates of no interest during the preprocessing step (see methods for details). Supplementary Table shows the mean  $\pm$  s.e.m for the patient groups and their corresponding healthy subjects used in the study. In general, absolute head displacements were smaller than 1 mm (smaller than the voxel size) for all functional scans. Relation between  $k_D$  and head motion was assessed using a Pearson correlation analysis. There was no significant association between head motion and  $k_D$  for all groups examined. Differences in head motion between the patient groups and corresponding healthy controls were computed using the ANOVA or repeated measure ANOVA. There were no significant differences between groups, although in some groups there was a trend.



| <b>Analysis</b>  | <b>Figure</b> | <b>Correlation (BDI - <math>k_D</math>)</b><br>r -value (p-value) |
|------------------|---------------|-------------------------------------------------------------------|
| CBP              | Fig 1d        | -0.07 (0.78)                                                      |
| OA               | Fig 1d        | 0.14 (0.56)                                                       |
| CRPS             | Fig 1d        | 0.19 (0.57)                                                       |
| SBP (visit 1)    | Fig 6b        | -0.27 (0.39)                                                      |
| SBP (visit 2)    | Fig 6b        | -0.32 (0.31)                                                      |
| SBP (visit 3)    | Fig 6b        | -0.28 (0.35)                                                      |
| CBP (visit 1)    | Fig S8        | -0.35 (0.32)                                                      |
| CBP (visit 2)    | Fig S8        | -0.25 (0.54)                                                      |
| CBP (validation) | Fig S9        | 0.14 (0.61)                                                       |
| OA (validation)  | Fig S9        | -0.08 (0.93)                                                      |

**Supplementary Table 13. No relationship observed between depression and rank order disruption index.** Individual subject relationship between  $k_D$  and depression as assessed by BDI was computed using a Pearson correlation analysis. There was no significant association between BDI and  $k_D$  for all patient groups examined.

### Supplementary references

- 1 Yarkoni, T., Poldrack, R. A., Nichols, T. E., Van Essen, D. C. & Wager, T. D. Large-scale automated synthesis of human functional neuroimaging data. *Nat Methods* **8**, 665-670, doi:10.1038/nmeth.1635
- 2 Power, J. D. *et al.* Methods to detect, characterize, and remove motion artifact in resting state fMRI. *Neuroimage* **84**, 320-341, doi:10.1016/j.neuroimage.2013.08.048 (2014).
